# Supplementary figures and images for: Antibacterial Titanium Implants Biofunctionalized by Plasma Electrolytic Oxidation with Silver, Zinc, and Copper: A Systematic Review
Source: MDPI journal article supplement (doi:10.3390/ijms22073800), 2021-04-06

Suppl.figure 1

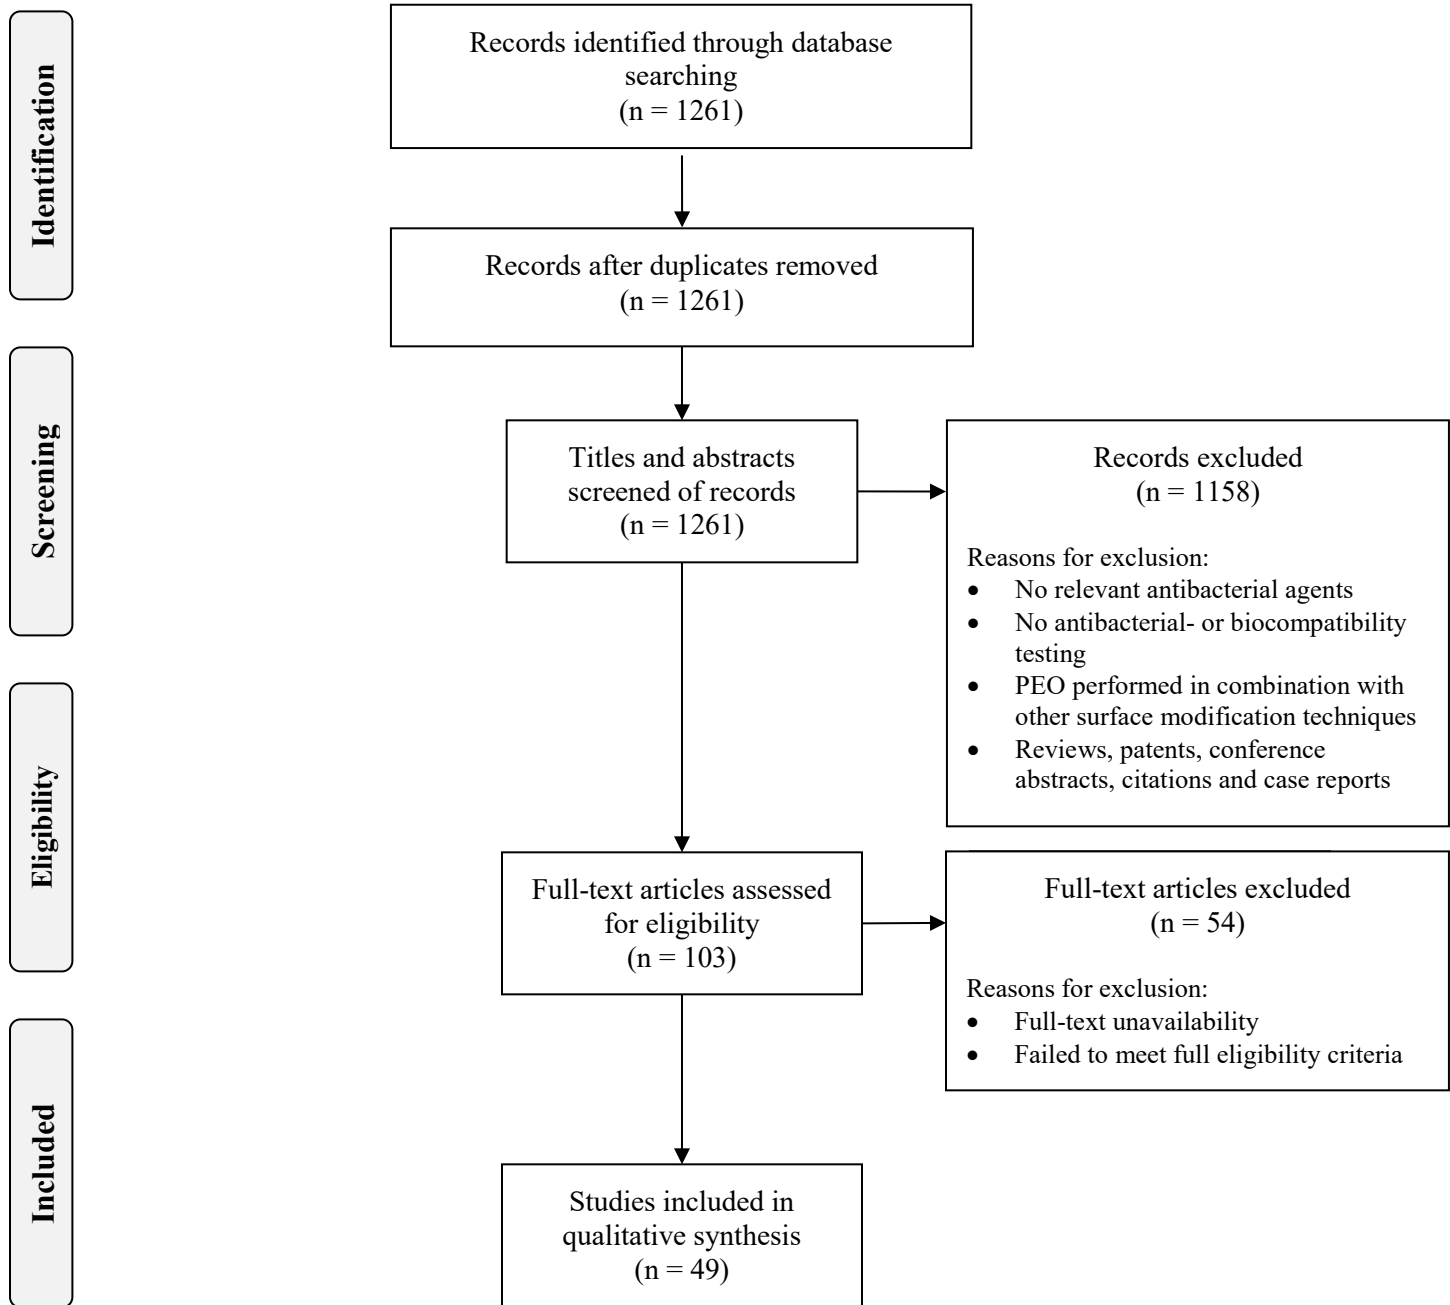

Supplement: s1 [file s1]
